# Supplementary material for: The improvement of the high voltage performance of LiCoO2 by coating LiTaO3via magnetron sputtering
Source: Royal Society of Chemistry journal article supplement (doi:10.1039/d3ce00873h), 2023-01-01
Supplement: d3ce00873h1.pdf [file d3ce00873h1.pdf]

## Supporting Information

### **The improvement of high voltage performance of $\text{LiCoO}_2$ by coating $\text{LiTaO}_3$ via magnetron sputtering**

*Chenhui Wang, Shaopeng Li, Weiyi Chen, Yining Zhao, Shu Xu, Hui Dou, Xiaogang Zhang\**

Jiangsu Key Laboratory of Electrochemical Energy Storage Technologies, College of Material  
Science and Engineering, Nanjing University of Aeronautics and Astronautics, Nanjing, 210016,  
P. R. China.

\*Corresponding author's e-mail: [azhangxg@nuaa.edu.cn](mailto:azhangxg@nuaa.edu.cn)

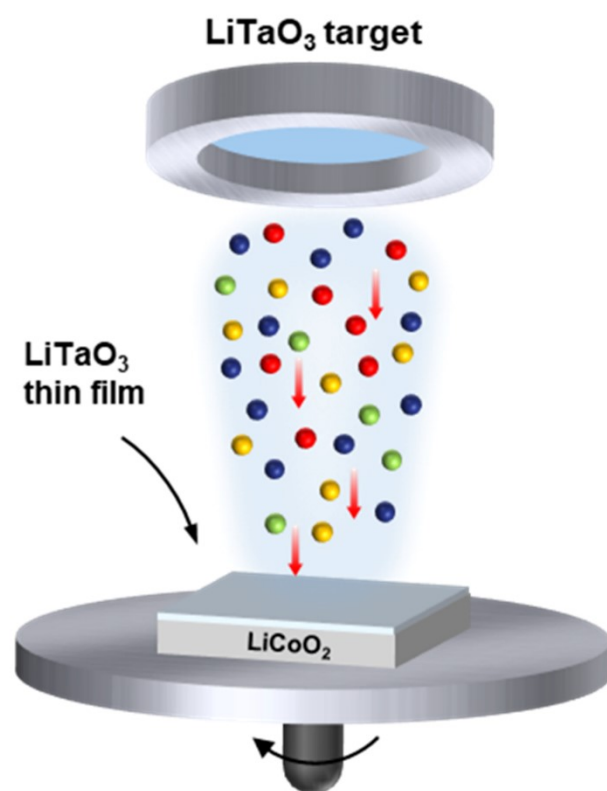

**Fig S1.** Schematic diagram of magnetron sputtering.

a)

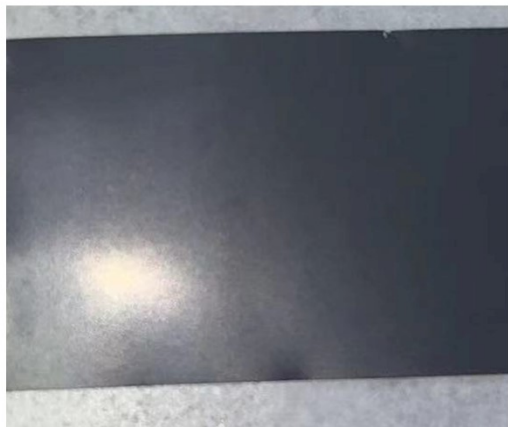

b)

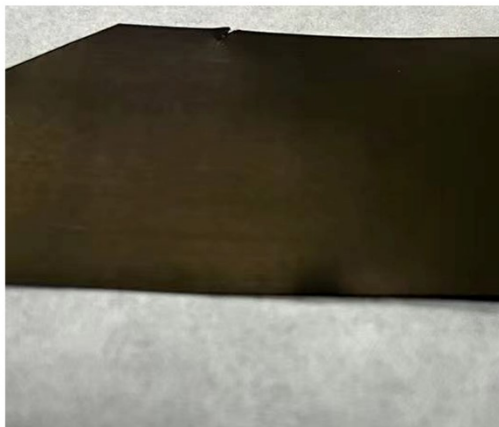

**Fig S2.** The picture of (a) MS-0h and (b) MS-2h electrode surface.

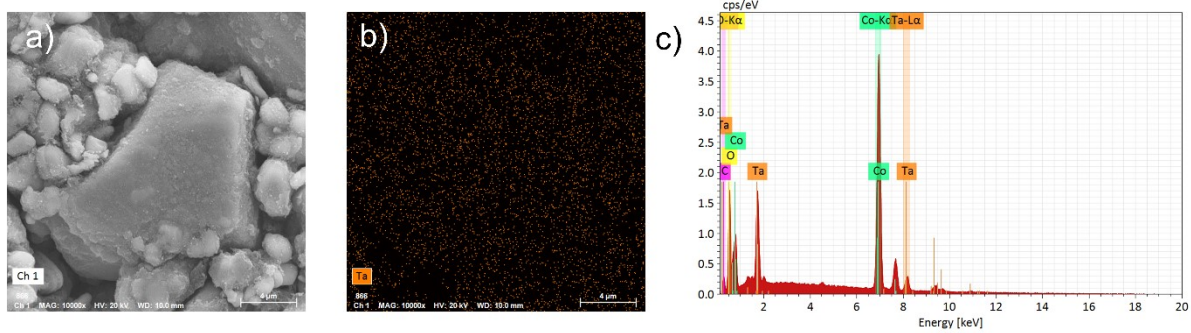

**Fig S3.** (a) SEM , (b) Ta mapping image and (c) EDS of MS-2h.

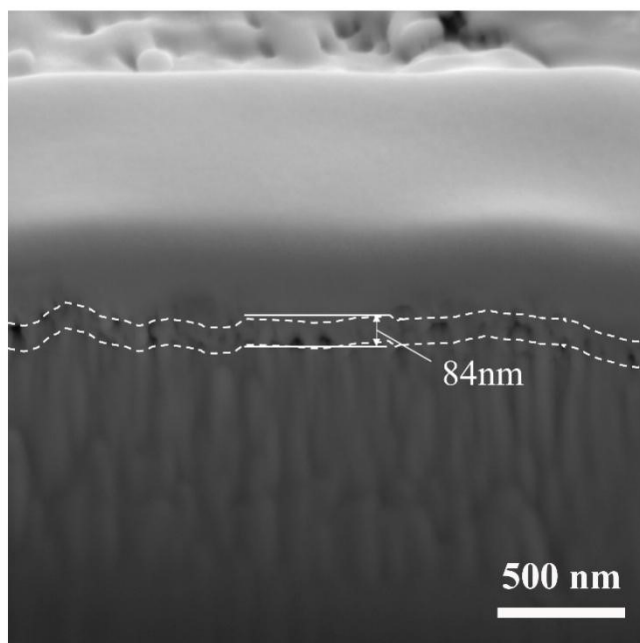

**Fig S4.** The image of FIB of MS-2h

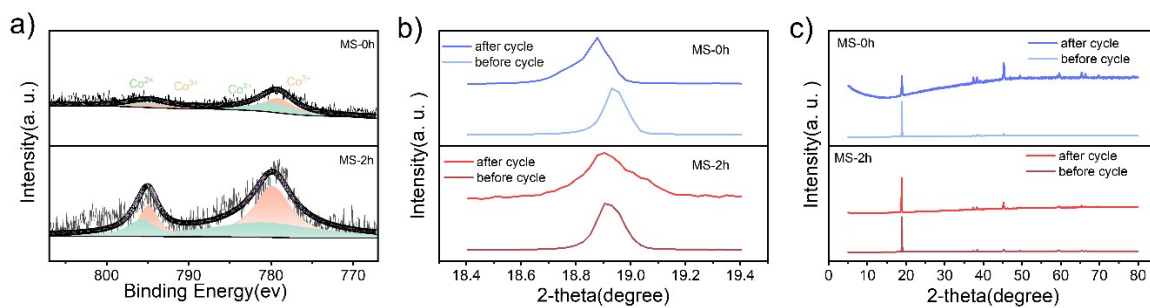

**Fig. S5.** (a) XPS spectra of Co<sub>2</sub>p after 100 cycles under 4.6V at 0.5C, (b) (003) peak of the different electrodes, (c) The whole XRD pattern of the different electrodes.

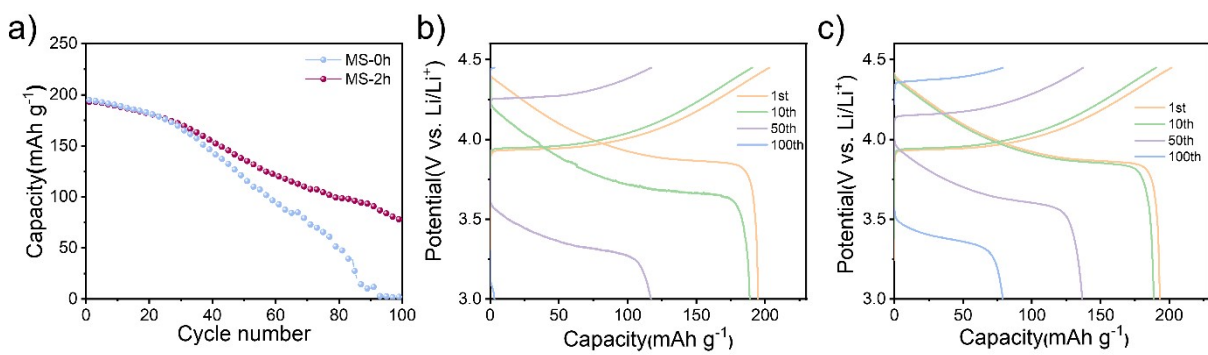

**Fig. S6.** (a) Cycle capacity of MS-0h and MS-2h at 50°C; GCD curve of (b) MS-0h and (c) MS-2h.

**Table S1.**  $R_s$ ,  $R_{ct}$  and  $R_{CEI}$  of MS-0h and MS-2h before and after 100 cycles.

|              |       | $R_s$ | $R_{ct}$ | $R_{sf}$ |
|--------------|-------|-------|----------|----------|
| Before cycle | MS-0h | 2.904 | 191.3    |          |
|              | MS-2h | 2.739 | 271.3    |          |
| After cycle  | MS-0h | 2.877 | 113.0    | 6.0      |
|              | MS-2h | 2.383 | 50.0     | 4.6      |
